# Supplementary material for: The impact of nurses’ stress situation coping on somatization: a mediated moderation model
Source: PeerJ. 2024 Dec 6;12:e18658. doi: 10.7717/peerj.18658 (PMC11627075; doi:10.7717/peerj.18658)
Supplement: Supplemental Information 1 [file peerj-12-18658-s001.xlsx]

## Sheet: Sheet1
Number	Gender	Age	Title	Work Experience	Residence	During the epidemic, did you seek psychological assistance?	Have you ever taken psychotropic drugs before?	In the past month, have you visited or transited through high-risk areas?	Place of Isolation	PHQ1	PHQ2	PHQ3	PHQ4	PHQ5	PHQ6	PHQ7	PHQ8	PHQ9	PHQ-9 Total score	SSS1	PHQ3	PHQ4	PHQ1	SSS2	GAD1	SSS3	PHQ7	SSS4	SSS5	SSS6	SSS7	SSS8	SSS9	SSS10	SSS11	SSS12	SSS13	SSS14	SSS15	SSS Total score	PSS1	PSS2	PSS3	PSS0	PSS5	PSS6	PSS7	PSS8	PSS9
1	Female	35	Intermediate and Above	12	Urban	NO	No	No	Hospital isolation	0	0	0	0	0	0	0	0	0	0	1	1	1	1	1	1	1	1	1	1	1	1	1	1	1	1	1	1	1	1	20	1	1	1	3	3	1	3	3	1
4	Female	32	Intermediate and Above	11	Urban	NO	No	No	Home isolation	0	0	1	1	0	0	0	0	0	2	1	2	2	1	1	1	1	1	1	1	1	1	1	1	1	1	1	1	1	1	22	0	0	0	4	4	0	4	4	0
5	Female	26	Entry-Level	5	Urban	NO	No	No	Home isolation	1	1	1	1	1	0	1	0	0	6	1	2	2	2	1	2	1	2	1	1	1	1	1	1	1	1	1	1	1	1	25	1	0	0	4	1	0	3	4	0
7	Female	26	Entry-Level	5	Urban	NO	No	No	Home isolation	0	0	1	0	0	0	0	0	0	1	1	2	1	1	1	1	1	1	1	2	1	1	1	1	1	1	1	1	1	1	22	0	1	0	1	1	1	1	0	1
8	Female	29	Entry-Level	7	Urban	NO	No	No	Home isolation	0	0	1	1	1	1	1	1	0	6	2	2	2	1	1	2	2	2	2	2	2	2	1	2	2	2	2	1	1	1	34	1	1	1	1	2	2	3	3	1
14	Female	37	Intermediate and Above	14	Urban	NO	No	No	Hospital isolation	0	0	2	1	1	0	1	0	0	5	2	3	2	1	2	2	2	2	2	2	1	2	2	2	1	2	1	1	2	1	35	1	1	0	2	4	1	3	3	1
15	Female	30	Entry-Level	8	Urban	NO	No	No	Home isolation	2	2	3	3	3	0	3	3	1	20	2	4	4	3	3	3	3	4	1	3	2	2	4	2	1	3	2	2	2	2	52	3	3	3	1	2	3	1	2	3
16	Female	30	Intermediate and Above	7	Urban	NO	No	No	Home isolation	1	1	0	0	0	1	1	0	0	4	1	1	1	2	1	2	1	2	1	1	1	1	1	1	1	1	1	1	1	2	24	1	1	1	1	1	1	1	1	1
22	Female	34	Intermediate and Above	12	Urban	NO	No	No	Home isolation	0	0	0	0	0	0	0	0	0	0	1	1	1	1	1	1	1	1	1	1	1	1	1	1	1	1	1	1	1	1	20	0	0	0	4	4	0	4	4	0
23	Female	46	Intermediate and Above	26	Urban	NO	No	No	Hospital isolation	0	0	0	0	0	0	0	0	0	0	1	1	1	1	1	1	1	1	1	1	1	1	1	1	1	1	1	1	1	1	20	1	1	1	3	3	1	3	3	1
28	Female	32	Entry-Level	9	Urban	NO	No	No	Home isolation	0	0	0	0	0	0	0	0	0	0	1	1	1	1	1	1	1	1	1	1	1	1	1	1	1	1	1	1	1	1	20	2	2	2	2	2	2	2	2	2
29	Female	32	Intermediate and Above	9	Urban	NO	No	Yes	Home isolation	0	0	1	0	0	0	0	0	0	1	1	2	1	1	1	2	1	1	1	1	1	1	1	1	1	1	3	1	1	1	24	1	0	0	4	4	0	4	4	0
30	Female	27	Entry-Level	5	Urban	NO	No	No	Home isolation	1	1	1	1	0	0	0	0	0	4	1	2	2	2	1	1	1	1	1	1	1	1	1	1	1	1	1	1	1	1	23	1	1	1	2	1	1	2	2	1
31	Female	33	Entry-Level	12	Urban	NO	No	No	Home isolation	0	0	1	0	1	0	0	0	0	2	1	2	1	1	1	1	1	1	1	2	1	1	1	1	1	1	1	1	1	3	24	0	0	0	4	4	0	4	4	0
32	Female	30	Entry-Level	9	Urban	NO	No	No	Hospital isolation	1	2	2	1	1	0	0	0	0	7	1	3	2	2	1	1	1	1	1	1	1	1	1	1	1	1	1	1	1	1	24	1	1	0	4	4	0	4	4	0
33	Female	43	Intermediate and Above	16	Urban	NO	No	No	Home isolation	0	0	1	0	0	0	0	0	0	1	1	2	1	1	1	1	1	1	1	1	1	1	1	1	1	1	1	1	1	1	21	0	0	0	4	4	0	4	4	0
34	Female	49	Intermediate and Above	29	Urban	NO	No	No	Hospital isolation	0	0	0	0	0	0	0	0	0	0	1	1	1	1	2	1	1	1	1	1	1	1	1	1	1	2	2	1	1	1	23	0	0	0	4	4	0	4	4	0
35	Female	30	Entry-Level	6	Urban	NO	No	No	Home isolation	1	1	1	1	1	1	0	0	0	6	1	2	2	2	1	2	2	1	2	2	2	1	1	1	1	1	2	1	1	2	30	1	1	1	3	3	1	2	2	2
37	Female	27	Entry-Level	4	Urban	NO	No	No	Hospital isolation	0	0	0	0	0	0	0	0	0	0	1	1	1	1	1	1	1	1	1	1	1	1	1	1	1	1	1	1	1	1	20	0	0	0	4	4	0	4	4	0
40	Female	29	Entry-Level	8	Urban	NO	No	No	Home isolation	1	1	1	1	0	1	2	0	0	7	1	2	2	2	1	2	2	3	1	2	1	1	1	1	2	1	3	1	1	1	31	1	1	1	3	2	1	2	2	1
41	Female	35	Intermediate and Above	14	Urban	NO	No	No	Home isolation	1	0	1	1	0	1	2	1	0	7	2	2	2	2	1	2	1	3	2	2	1	1	1	1	1	1	1	1	1	2	30	1	1	1	3	3	1	2	3	1
42	Female	35	Intermediate and Above	11	Urban	NO	No	No	Hospital isolation	0	0	0	0	0	0	0	0	0	0	1	1	1	1	1	1	1	1	1	1	1	1	1	1	1	1	1	1	1	1	20	0	0	0	4	4	0	4	4	0
43	Female	32	Intermediate and Above	9	Urban	NO	No	No	Home isolation	0	0	0	1	0	0	0	0	0	1	1	1	2	1	1	2	1	1	1	1	1	1	1	1	1	1	2	1	2	1	24	1	0	0	1	2	0	1	1	1
44	Female	30	Entry-Level	6	Urban	NO	No	No	Home isolation	0	0	0	0	0	0	0	0	0	0	1	1	1	1	1	1	1	1	1	1	1	1	1	1	1	1	1	1	1	1	20	1	1	1	3	3	1	3	3	1
46	Female	33	Intermediate and Above	11	Urban	NO	No	No	Home isolation	1	0	1	1	0	0	0	0	0	3	2	2	2	2	1	1	1	1	1	1	1	1	1	1	1	1	1	1	1	1	24	1	0	0	1	2	0	0	1	1
47	Female	36	Intermediate and Above	14	Urban	NO	No	No	Home isolation	0	0	0	0	0	0	0	0	0	0	1	1	1	1	1	1	1	1	1	1	1	1	1	1	1	1	1	1	1	1	20	1	1	0	3	3	1	1	1	1
48	Female	34	Intermediate and Above	12	Urban	NO	No	Yes	Hospital isolation	1	0	0	1	1	0	1	0	0	4	2	1	2	2	2	1	1	2	2	2	2	1	1	1	1	2	1	1	2	2	31	1	0	0	1	1	1	1	1	0
49	Female	28	Entry-Level	8	Urban	NO	No	No	Home isolation	0	0	0	0	0	0	0	0	0	0	1	1	1	1	1	1	1	1	1	1	1	1	1	1	1	1	1	1	1	1	20	0	0	0	4	4	0	4	4	0
50	Female	41	Intermediate and Above	23	Urban	NO	No	No	Home isolation	1	1	1	1	1	1	1	1	0	8	3	2	2	2	3	4	2	2	3	3	1	1	2	1	2	2	2	1	1	1	40	2	2	2	1	2	0	2	1	1
51	Female	29	Intermediate and Above	8	Urban	NO	No	No	Hospital isolation	0	0	0	0	0	0	0	0	0	0	1	1	1	1	1	1	1	1	1	1	1	1	1	1	1	1	1	1	1	1	20	1	1	0	3	3	1	2	2	1
52	Female	47	Intermediate and Above	29	Urban	NO	No	No	Hospital isolation	0	0	0	0	0	0	0	0	0	0	1	1	1	1	1	1	1	1	1	1	1	1	1	1	1	1	1	1	1	1	20	0	1	0	0	2	0	0	0	0
54	Female	33	Entry-Level	9	Urban	Yes	No	No	Hospital isolation	1	1	1	1	1	1	1	1	0	8	1	2	2	2	1	2	2	2	1	1	1	1	1	1	2	1	2	1	1	1	28	1	1	1	3	3	1	3	3	1
56	Female	27	Entry-Level	4	Urban	No	No	No	Home isolation	0	0	0	0	0	0	0	0	0	0	1	1	1	1	1	1	1	1	1	1	1	1	1	1	1	1	1	1	1	1	20	1	0	0	1	2	0	3	1	0
58	Female	29	Intermediate and Above	8	Urban	No	No	No	Hospital isolation	1	1	2	2	2	1	1	1	0	11	2	3	3	2	3	2	2	2	2	3	2	3	2	2	2	2	2	4	3	1	47	3	2	1	3	3	3	2	3	3
60	Female	48	Intermediate and Above	27	Urban	No	No	No	Hospital isolation	0	0	1	1	1	1	1	0	0	5	1	2	2	1	1	1	1	2	1	2	1	1	2	2	1	1	2	1	2	1	28	1	1	1	4	3	1	3	3	1
61	Female	42	Intermediate and Above	15	Urban	No	No	No	Hospital isolation	1	0	3	1	2	0	1	1	0	9	3	4	2	2	1	2	1	2	1	2	2	2	2	2	2	1	2	2	2	1	38	2	2	1	4	2	0	4	4	1
62	Female	31	Intermediate and Above	10	Urban	No	No	No	Home isolation	1	1	0	0	0	1	1	1	0	5	1	1	1	2	1	1	1	2	1	1	1	1	1	1	1	1	1	1	1	1	22	1	1	0	4	3	1	3	3	1
63	Female	32	Intermediate and Above	11	Urban	No	No	No	Home isolation	0	0	0	0	0	0	1	0	0	1	1	1	1	1	1	1	1	2	1	1	1	1	1	1	1	1	1	1	1	1	21	0	0	0	4	4	0	4	4	0
64	Female	39	Intermediate and Above	20	Urban	No	No	No	Hospital isolation	0	0	0	0	0	0	0	0	0	0	1	1	1	1	1	1	1	1	1	1	1	1	1	1	1	1	1	1	1	1	20	1	0	0	4	4	0	4	4	0
66	Female	33	Intermediate and Above	9	Urban	No	No	No	Hospital isolation	2	1	2	0	3	0	0	0	0	8	1	3	1	3	1	1	1	1	1	3	1	2	1	2	2	1	1	1	2	1	30	0	0	1	4	1	0	0	0	0
67	Female	27	Entry-Level	5	Urban	No	No	No	Hospital isolation	0	0	3	2	2	0	0	0	0	7	2	4	3	1	1	1	1	1	2	3	1	1	1	1	1	1	2	1	1	1	30	0	0	0	4	3	1	3	3	1
68	Female	31	Intermediate and Above	11	Urban	No	No	Yes	Hospital isolation	1	1	2	2	2	1	1	1	0	11	2	3	3	2	2	2	2	2	2	1	2	2	1	1	1	2	2	2	1	2	37	3	3	3	1	1	2	2	3	1
71	Female	26	Entry-Level	4	Urban	No	No	No	Home isolation	0	0	1	0	0	0	0	0	0	1	1	2	1	1	1	2	2	1	1	1	1	1	1	2	1	1	1	1	1	1	24	1	1	0	2	1	1	3	3	1
72	Female	31	Entry-Level	6	Urban	No	No	No	Home isolation	1	1	1	1	1	1	1	1	1	9	1	2	2	2	1	2	1	2	1	1	1	1	1	1	1	1	2	2	1	1	27	1	1	1	2	2	2	2	2	2
73	Female	27	Entry-Level	5	Urban	No	No	No	Hospital isolation	0	0	0	0	0	0	0	0	0	0	1	1	1	1	1	1	1	1	1	1	1	1	1	1	1	1	1	1	1	1	20	0	0	0	4	4	0	4	4	0
74	Female	32	Intermediate and Above	13	Urban	No	No	No	Hospital isolation	1	0	2	1	1	0	1	0	0	6	1	3	2	2	1	2	2	2	2	2	2	2	1	1	2	1	2	1	1	1	33	1	1	1	4	4	1	0	2	1
75	Female	47	Intermediate and Above	30	Urban	No	No	No	Hospital isolation	0	0	0	0	1	0	0	0	0	1	1	1	1	1	1	2	1	1	1	1	1	1	1	1	1	1	1	1	1	1	21	1	1	0	1	1	1	0	1	1
76	Female	38	Intermediate and Above	18	Urban	No	No	No	Hospital isolation	2	1	2	2	2	0	3	2	0	14	2	3	3	3	2	3	2	4	3	2	3	2	1	1	1	1	1	1	1	1	40	1	0	1	1	3	1	1	1	1
77	Female	37	Intermediate and Above	16	Urban	No	No	No	Hospital isolation	0	0	3	0	2	0	0	0	0	5	1	4	1	1	1	1	1	1	2	2	1	1	1	1	1	1	1	1	1	1	25	0	0	0	4	4	0	4	4	0
78	Male	29	Entry-Level	8	Urban	No	No	No	Hospital isolation	0	0	1	1	1	0	0	0	0	3	1	2	2	1	1	1	1	1	1	2	1	1	1	2	1	1	1	1	1	1	24	1	0	0	4	4	0	4	4	0
79	Female	33	Intermediate and Above	12	Urban	No	No	No	Hospital isolation	3	2	2	2	2	0	3	3	0	17	1	3	3	4	1	3	1	4	1	1	1	1	1	2	1	2	1	1	1	1	34	3	2	2	4	4	2	3	4	2
80	Female	35	Intermediate and Above	12	Urban	No	No	Yes	Hospital isolation	1	1	2	2	3	1	1	1	0	12	1	3	3	2	1	3	2	2	3	3	1	1	1	1	2	1	1	1	1	1	34	2	2	1	2	3	1	1	2	2
81	Female	31	Intermediate and Above	7	Urban	No	Yes	No	Hospital isolation	3	2	3	3	3	0	1	0	0	15	2	4	4	4	1	4	2	2	2	1	3	2	1	2	1	2	1	2	1	2	43	1	3	1	3	3	1	1	3	2
83	Female	40	Intermediate and Above	17	Urban	No	No	No	Hospital isolation	0	0	0	1	1	0	1	0	0	3	2	1	2	1	1	2	1	2	2	2	1	2	1	1	1	1	2	1	1	1	28	2	1	1	2	2	2	1	2	1
84	Female	31	Entry-Level	9	Urban	No	No	Yes	Home isolation	0	0	1	1	0	0	0	0	0	2	1	2	2	1	1	2	1	1	1	2	1	1	2	1	1	1	1	1	1	1	25	0	0	0	4	4	0	4	4	0
85	Female	40	Intermediate and Above	23	Urban	No	No	No	Hospital isolation	1	1	1	1	0	0	1	1	0	6	1	2	2	2	1	1	2	2	2	2	1	1	1	1	2	1	1	1	1	1	28	2	2	1	1	1	1	1	1	1
88	Female	39	Intermediate and Above	19	Urban	No	No	No	Home isolation	0	0	1	1	0	0	0	1	0	3	1	2	2	1	1	1	1	1	1	1	1	1	1	1	2	1	1	2	1	1	24	1	0	0	0	2	1	1	1	1
89	Female	31	Entry-Level	7	Urban	No	No	No	Home isolation	0	1	0	1	0	0	0	0	0	2	1	1	2	1	1	1	1	1	1	1	1	1	1	2	1	1	1	1	1	1	22	1	1	0	2	2	1	1	4	0
90	Female	41	Entry-Level	16	Urban	No	No	No	Home isolation	0	0	0	0	0	0	0	0	0	0	1	1	1	1	1	1	1	1	1	1	1	1	1	1	1	1	1	1	1	1	20	0	0	0	4	4	0	4	4	0
91	Female	30	Entry-Level	9	Urban	No	No	Yes	Hospital isolation	0	0	0	0	0	0	0	0	0	0	1	1	1	1	1	1	1	1	1	1	1	1	1	1	1	1	1	1	1	1	20	0	0	0	4	4	0	4	4	0
92	Female	30	Entry-Level	7	Urban	No	No	No	Hospital isolation	1	2	0	1	1	1	2	2	1	11	2	1	2	2	2	3	2	3	2	2	1	1	1	2	1	1	2	2	2	1	35	1	1	1	3	3	1	3	3	1
93	Female	32	Entry-Level	7	Urban	No	No	No	Home isolation	0	0	1	0	0	0	0	0	0	1	1	2	1	1	1	1	1	1	1	1	1	1	1	1	1	1	1	1	1	1	21	0	0	0	1	2	1	1	1	1
94	Female	42	Intermediate and Above	22	Urban	No	No	No	Home isolation	0	0	0	1	0	0	0	1	0	2	1	1	2	1	1	1	1	1	1	2	1	1	1	2	1	1	1	1	1	1	23	1	0	0	1	1	1	1	1	2
95	Female	36	Intermediate and Above	13	Urban	No	No	No	Home isolation	1	1	2	1	0	1	2	0	0	8	2	3	2	2	1	2	1	3	1	1	1	1	1	2	1	1	1	1	1	1	29	1	0	0	2	2	2	2	2	2
96	Female	35	Intermediate and Above	13	Urban	No	No	No	Home isolation	0	1	1	1	1	0	0	0	0	4	2	2	2	1	2	1	2	1	2	2	1	3	1	2	2	1	2	1	1	1	32	1	1	0	1	3	1	1	1	1
98	Female	37	Intermediate and Above	16	Urban	No	No	No	Hospital isolation	0	0	0	0	0	0	0	0	0	0	1	1	1	1	1	1	1	1	1	1	1	1	1	1	1	1	4	1	1	1	23	1	0	0	4	2	0	3	1	0
99	Female	28	Entry-Level	4	Urban	No	No	No	Home isolation	0	0	0	0	0	0	0	0	0	0	1	1	1	1	1	1	1	1	1	1	1	1	1	1	1	1	2	1	1	1	21	1	1	0	3	3	0	2	3	1
100	Female	27	Entry-Level	5	Urban	No	No	No	Hospital isolation	0	0	1	1	0	0	1	0	0	3	2	2	2	1	1	1	1	2	2	2	1	1	1	2	1	1	1	1	1	1	27	1	0	1	4	2	1	1	2	0
101	Female	33	Intermediate and Above	8	Urban	No	No	No	Hospital isolation	1	1	0	0	0	0	1	0	0	3	1	1	1	2	1	1	2	2	1	1	1	1	1	1	1	1	1	1	1	1	23	0	0	1	3	4	0	3	3	0
104	Female	39	Intermediate and Above	18	Urban	No	No	No	Hospital isolation	0	1	1	1	0	0	0	0	0	3	1	2	2	1	2	2	2	1	1	2	2	1	1	1	1	2	1	1	1	1	28	1	1	1	3	3	1	3	2	1
105	Female	30	Entry-Level	8	Urban	No	No	No	Home isolation	1	0	0	0	0	0	0	0	0	1	1	1	1	2	1	1	1	1	1	1	1	1	1	1	1	1	1	1	1	1	21	1	1	1	3	3	1	1	1	1
106	Female	29	Intermediate and Above	7	Urban	No	No	Yes	Home isolation	3	2	2	1	0	0	1	0	0	9	1	3	2	4	1	3	2	2	1	1	1	1	1	2	1	1	1	1	1	1	31	3	0	1	0	1	1	1	1	2
107	Female	30	Entry-Level	7	Urban	No	No	No	Home isolation	1	1	1	1	1	1	1	0	0	7	2	2	2	2	2	2	1	2	1	1	2	1	2	1	2	1	2	1	1	1	31	1	1	1	3	3	1	3	3	1
108	Female	27	Entry-Level	5	Urban	No	No	No	Hospital isolation	1	1	2	2	1	0	1	1	0	9	2	3	3	2	2	2	2	2	2	1	1	1	1	2	1	2	2	1	2	2	36	1	1	1	1	1	3	2	1	3
109	Female	49	Intermediate and Above	30	Urban	No	No	Yes	Hospital isolation	1	1	3	2	1	1	1	1	0	11	2	4	3	2	1	3	2	2	1	3	2	1	2	2	1	1	1	1	1	1	36	1	2	2	3	3	2	2	3	1
111	Female	31	Intermediate and Above	9	Urban	No	No	No	Hospital isolation	2	1	1	1	3	0	2	3	0	13	1	2	2	3	1	4	1	3	2	2	1	1	1	1	2	1	2	1	2	1	34	2	2	1	2	1	2	3	3	1
112	Female	32	Entry-Level	13	Urban	No	No	No	Hospital isolation	0	0	1	0	0	0	0	0	0	1	2	2	1	1	2	2	2	1	2	2	2	1	1	2	2	2	2	2	2	2	35	2	1	0	3	3	1	4	3	0
115	Female	37	Intermediate and Above	14	Urban	No	No	No	Hospital isolation	1	1	3	1	1	0	1	1	0	9	2	4	2	2	1	2	2	2	2	1	1	1	1	1	1	2	2	1	2	1	33	2	2	2	2	2	1	2	2	2
116	Female	35	Intermediate and Above	12	Urban	No	No	No	Hospital isolation	1	0	0	1	0	0	1	0	0	3	1	1	2	2	1	1	1	2	1	1	1	1	2	1	1	1	1	1	1	1	24	1	0	0	1	1	0	1	1	0
119	Female	28	Entry-Level	7	Urban	No	No	No	Hospital isolation	1	1	1	1	1	1	2	1	0	9	2	2	2	2	2	2	3	3	2	3	2	1	2	3	3	2	2	1	1	2	42	2	2	2	3	3	2	2	3	2
122	Female	33	Entry-Level	10	Urban	No	No	No	Hospital isolation	1	0	2	1	1	0	0	0	0	5	3	3	2	2	1	1	1	1	1	1	1	1	1	1	1	1	1	1	1	1	26	0	0	0	4	4	0	4	4	0
124	Female	30	Intermediate and Above	6	Urban	No	No	No	Home isolation	1	1	1	1	1	1	1	1	0	8	1	2	2	2	1	2	2	2	1	1	1	1	1	1	1	1	1	1	1	1	26	2	2	2	2	2	2	1	2	2
125	Female	42	Intermediate and Above	22	Urban	No	No	No	Hospital isolation	1	0	2	1	3	0	0	0	0	7	1	3	2	2	1	1	1	1	2	2	1	2	2	1	1	1	1	1	1	1	28	1	1	0	1	2	1	1	1	0
126	Female	30	Entry-Level	3	Urban	No	No	No	Home isolation	1	0	0	0	0	0	0	0	0	1	1	1	1	2	1	1	1	1	1	1	1	1	1	1	1	1	1	1	1	1	21	1	1	1	1	3	1	1	2	1
127	Female	40	Intermediate and Above	19	Urban	No	No	No	Hospital isolation	0	1	2	2	2	0	0	0	0	7	2	3	3	1	1	2	2	1	1	2	1	1	1	1	1	1	3	1	1	1	30	1	1	1	3	3	1	3	3	1
128	Female	29	Entry-Level	6	Rural or Township	No	No	No	Home isolation	0	1	2	1	1	1	1	1	0	8	1	3	2	1	1	2	1	2	1	1	1	1	1	1	1	1	1	1	1	1	25	1	1	1	2	3	1	3	3	1
131	Female	27	Entry-Level	5	Urban	No	No	No	Home isolation	1	1	1	1	1	0	1	0	0	6	1	2	2	2	1	1	1	2	1	2	1	1	2	1	1	1	1	1	2	1	27	1	1	1	2	2	1	3	2	0
132	Female	29	Entry-Level	7	Urban	No	No	No	Home isolation	1	1	1	1	1	1	2	2	1	11	2	2	2	2	2	2	2	3	2	2	2	2	2	2	2	1	2	2	3	2	41	1	1	1	3	3	1	3	3	2
133	Female	27	Entry-Level	2	Urban	No	No	No	Hospital isolation	1	1	1	1	1	1	1	1	1	9	1	2	2	2	1	2	1	2	1	1	1	1	1	2	2	2	2	1	1	2	30	1	1	1	3	3	1	3	3	1
134	Female	53	Intermediate and Above	33	Urban	No	Yes	No	Hospital isolation	0	0	1	1	0	0	0	0	0	2	1	2	2	1	1	1	1	1	1	1	1	1	1	1	1	1	1	1	1	1	22	1	1	1	3	4	0	4	0	0
135	Female	32	Intermediate and Above	10	Urban	No	No	Yes	Hospital isolation	1	1	1	1	1	1	1	1	1	9	2	2	2	2	2	2	2	2	2	2	2	2	2	2	2	2	2	2	2	2	40	1	1	1	3	3	1	3	3	1
136	Female	30	Entry-Level	5	Urban	No	No	No	Hospital isolation	1	1	2	1	1	0	0	1	0	7	2	3	2	2	1	2	1	1	1	1	1	1	1	1	1	1	2	1	2	2	29	1	1	0	2	1	1	1	2	1
137	Female	30	Entry-Level	9	Urban	No	No	No	Hospital isolation	1	1	1	1	2	1	1	1	0	9	1	2	2	2	1	2	1	2	1	3	2	1	1	2	3	2	1	1	1	1	32	1	1	1	3	3	2	2	2	2
138	Female	29	Entry-Level	5	Urban	No	No	No	Hospital isolation	1	1	2	1	0	0	1	1	0	7	2	3	2	2	2	2	2	2	2	2	1	2	2	2	1	2	1	1	2	2	37	1	1	1	3	3	1	3	3	1
139	Female	29	Entry-Level	10	Urban	No	No	No	Hospital isolation	2	2	2	2	2	0	2	1	1	14	2	3	3	3	2	2	2	3	1	2	1	1	1	2	1	1	2	1	2	1	36	1	1	1	2	2	1	3	2	2
140	Female	29	Entry-Level	8	Urban	No	No	No	Home isolation	0	0	1	1	0	0	1	0	0	3	1	2	2	1	1	1	1	2	1	1	1	1	1	1	1	1	1	1	1	1	23	0	0	0	1	3	1	0	1	2
141	Female	24	Entry-Level	1	Urban	No	No	No	Home isolation	2	1	0	2	0	0	3	0	0	8	1	1	3	3	1	1	3	4	1	1	2	1	1	2	1	1	1	1	1	1	31	1	0	0	2	2	0	1	2	0
142	Female	25	Entry-Level	2.5	Urban	No	No	No	Home isolation	0	0	1	1	1	0	2	0	0	5	1	2	2	1	1	2	2	3	2	1	1	1	1	1	2	1	1	1	1	1	28	1	1	0	1	1	2	1	2	0
143	Female	25	Entry-Level	5	Urban	Yes	No	No	Home isolation	1	1	1	1	1	1	1	1	0	8	2	2	2	2	3	2	2	2	1	1	3	2	2	2	3	2	3	1	1	1	39	0	0	1	3	3	1	3	3	0
144	Female	26	Entry-Level	3	Rural or Township	Yes	No	No	Home isolation	1	1	1	1	0	1	0	0	0	5	1	2	2	2	1	2	1	1	1	1	1	1	1	1	1	1	1	1	1	1	24	1	1	1	3	4	1	3	3	1
145	Female	24	Entry-Level	2	Urban	No	No	No	Hospital isolation	1	1	0	0	0	0	0	0	0	2	1	1	1	2	1	2	1	1	1	1	1	1	1	1	1	1	1	1	1	1	22	1	0	1	4	1	0	1	1	0
146	Female	32	Entry-Level	10	Urban	No	No	No	Home isolation	0	0	0	0	0	0	0	0	0	0	1	1	1	1	1	2	1	1	1	1	1	1	1	1	1	1	1	1	1	1	21	1	0	0	4	4	0	4	4	0
147	Female	24	Entry-Level	4	Urban	No	No	No	Home isolation	0	0	1	0	0	0	0	0	0	1	1	2	1	1	1	2	1	1	1	1	1	1	1	1	1	1	1	1	1	1	22	1	0	0	2	3	0	1	1	0
148	Female	40	Intermediate and Above	18	Urban	No	No	No	Home isolation	0	0	0	1	1	0	1	0	0	3	1	1	2	1	1	1	1	2	1	2	1	1	1	1	1	1	1	1	1	1	23	1	1	0	4	3	1	3	3	1
150	Female	28	Entry-Level	2	Urban	No	No	No	Home isolation	0	0	0	0	0	0	0	0	0	0	1	1	1	1	1	1	1	1	1	1	1	1	1	1	1	1	1	1	1	1	20	0	0	0	4	4	0	4	4	0
151	Female	29	Entry-Level	9	Urban	No	No	Yes	Hospital isolation	1	0	1	1	0	0	0	0	0	3	1	2	2	2	1	2	1	1	1	1	1	1	1	1	1	1	1	1	1	1	24	0	0	0	4	4	0	4	4	0
152	Female	33	Intermediate and Above	12	Urban	No	No	NO	Home isolation	1	1	2	1	1	0	1	1	0	8	2	3	2	2	1	2	1	2	1	2	1	1	1	2	1	1	1	1	1	1	29	2	1	2	1	1	1	1	1	1
153	Female	26	Entry-Level	5	Urban	No	No	NO	Hospital isolation	2	2	2	1	1	1	2	1	0	12	3	3	2	3	2	2	3	3	2	2	2	2	2	3	3	3	3	3	3	3	52	4	3	3	3	3	3	1	3	4
154	Female	27	Entry-Level	3	Urban	No	No	NO	Home isolation	0	0	1	0	0	0	0	0	0	1	1	2	1	1	1	1	1	1	1	1	1	1	1	1	1	1	1	1	2	1	22	0	0	0	3	3	0	1	4	1
155	Female	24	Entry-Level	2	Urban	No	No	NO	Home isolation	0	0	0	0	0	0	0	0	0	0	1	1	1	1	1	1	1	1	1	1	1	1	1	1	1	1	1	1	1	1	20	1	1	0	1	2	0	0	1	1
156	Female	34	Entry-Level	12	Urban	No	No	NO	Hospital isolation	1	1	1	1	1	1	1	1	1	9	1	2	2	2	1	2	1	2	2	1	1	1	1	1	1	2	2	1	2	1	29	2	1	1	3	3	1	4	3	1
157	Female	33	Intermediate and Above	11	Urban	No	No	Yes	Home isolation	1	1	1	1	0	1	0	1	0	6	2	2	2	2	2	3	2	1	1	2	1	1	1	1	2	1	2	1	1	1	31	1	1	1	3	3	2	2	2	2
158	Female	28	Entry-Level	8	Urban	No	No	NO	Home isolation	0	0	2	1	0	0	0	0	0	3	1	3	2	1	1	3	1	1	2	1	1	1	1	1	1	1	2	1	1	1	27	1	0	0	1	3	1	0	1	2
159	Female	33	Intermediate and Above	7	Urban	No	No	Yes	Home isolation	0	0	0	0	0	0	0	0	0	0	1	1	1	1	1	1	1	1	1	1	1	1	1	1	1	1	1	1	1	1	20	0	0	0	4	4	0	4	4	0
160	Female	31	Intermediate and Above	8	Urban	No	No	NO	Home isolation	1	0	0	0	0	0	0	0	0	1	1	1	1	2	1	1	1	1	1	1	1	1	1	1	1	1	1	1	1	1	21	1	1	0	4	3	1	1	1	1
161	Female	29	Entry-Level	7	Urban	No	No	NO	Hospital isolation	0	0	0	0	0	0	0	0	0	0	1	1	1	1	1	1	1	1	1	1	1	1	1	1	1	1	1	1	1	1	20	0	0	0	4	4	0	4	4	0
162	Female	26	Entry-Level	5	Urban	No	No	NO	Home isolation	0	0	0	0	0	0	0	0	0	0	1	1	1	1	1	1	1	1	1	1	1	1	1	1	1	1	1	1	1	1	20	0	0	0	4	4	0	4	4	0
163	Female	33	Intermediate and Above	12	Urban	No	No	NO	Home isolation	0	0	0	0	0	0	1	0	0	1	1	1	1	1	1	1	1	2	1	1	1	1	1	1	1	1	1	1	1	1	21	0	0	0	3	3	0	2	2	1
164	Female	35	Entry-Level	11	Urban	No	No	NO	Hospital isolation	2	2	2	2	1	0	2	0	0	11	2	3	3	3	2	2	2	3	2	2	2	1	1	2	2	2	3	1	3	3	44	3	3	2	3	3	2	3	3	2
165	Female	36	Intermediate and Above	13	Urban	No	No	NO	Hospital isolation	0	0	0	1	1	0	0	1	0	3	1	1	2	1	1	2	2	1	2	2	1	2	2	2	1	2	1	1	2	3	32	1	1	0	4	3	0	2	1	2
166	Female	30	Intermediate and Above	6	Urban	No	No	NO	Hospital isolation	1	1	2	1	1	1	1	1	0	9	3	3	2	2	2	2	2	2	2	2	2	1	1	3	1	3	2	1	2	1	39	1	2	1	3	3	1	3	3	1
167	Female	35	Intermediate and Above	14	Urban	No	No	NO	Home isolation	1	1	0	1	0	0	1	1	0	5	1	1	2	2	1	2	2	2	2	1	1	1	1	2	1	1	1	1	1	1	27	2	1	1	2	2	1	3	2	2
168	Female	25	Entry-Level	2	Urban	No	No	NO	Home isolation	0	1	0	0	1	0	0	0	0	2	1	1	1	1	1	1	1	1	1	1	1	1	1	1	1	1	2	1	1	1	21	1	1	1	3	4	0	2	1	1
169	Female	52	Intermediate and Above	33	Urban	No	Yes	Yes	Home isolation	1	1	1	1	1	1	1	1	0	8	4	2	2	2	2	3	3	2	1	1	2	2	1	3	2	3	4	2	1	1	43	2	2	2	2	3	2	0	2	2
170	Female	25	Entry-Level	7	Urban	No	No	NO	Hospital isolation	1	1	1	1	1	1	1	1	1	9	2	2	2	2	2	2	2	2	2	2	2	2	2	2	2	2	2	2	1	2	39	1	1	2	2	3	2	3	2	1
171	Female	34	Entry-Level	13	Urban	No	No	NO	Home isolation	0	1	1	0	0	1	0	0	0	3	2	2	1	1	2	2	2	1	1	2	2	1	1	1	1	1	1	1	1	1	27	2	2	0	1	4	2	0	3	3
172	Female	26	Entry-Level	3	Urban	No	No	NO	Home isolation	0	0	0	0	0	0	0	0	0	0	1	1	1	1	1	1	1	1	1	1	1	1	1	1	1	1	1	1	1	1	20	0	0	0	4	4	0	4	4	0
173	Female	33	Intermediate and Above	10	Urban	No	No	NO	Hospital isolation	0	1	1	1	1	0	0	0	0	4	1	2	2	1	1	2	1	1	1	1	1	1	1	1	1	1	1	1	2	1	24	1	1	1	1	1	0	1	1	0
174	Female	58	Intermediate and Above	40	Urban	No	No	NO	Hospital isolation	0	0	0	0	0	0	0	0	0	0	1	1	1	1	1	1	1	1	1	1	1	1	1	1	1	1	1	1	1	1	20	1	1	0	0	2	0	1	1	0
177	Female	33	Intermediate and Above	10	Urban	No	No	NO	Hospital isolation	1	1	1	1	1	0	0	0	0	5	2	2	2	2	1	2	2	1	2	2	2	1	1	2	1	1	3	2	1	1	33	1	1	1	3	4	1	3	1	1
179	Female	32	Intermediate and Above	10	Urban	No	No	NO	Home isolation	1	1	2	1	0	1	2	1	1	10	2	3	2	2	1	2	2	3	1	1	1	1	1	2	1	1	2	1	1	1	31	0	0	0	4	4	0	4	4	0
180	Female	36	Intermediate and Above	13	Urban	No	No	NO	Home isolation	1	1	2	2	0	0	0	0	0	6	3	3	3	2	2	2	2	1	1	2	2	2	2	2	2	1	3	1	1	1	38	2	2	2	3	3	1	2	4	2
181	Female	31	Entry-Level	10	Urban	No	No	NO	Home isolation	0	0	0	0	0	0	0	0	0	0	1	1	1	1	1	1	1	1	1	1	1	1	1	1	1	1	1	1	1	1	20	1	1	1	3	3	1	3	3	1
183	Female	54	Intermediate and Above	35	Urban	No	No	NO	Hospital isolation	0	0	1	0	0	0	1	0	0	2	2	2	1	1	1	2	2	2	1	2	1	2	2	2	2	1	1	1	1	1	30	1	0	1	2	2	2	2	2	2
184	Female	25	Entry-Level	2	Urban	No	No	NO	Home isolation	0	0	1	1	0	0	0	0	0	2	1	2	2	1	1	1	1	1	1	1	1	1	1	1	1	1	1	1	1	1	22	0	0	0	4	4	0	4	4	0
185	Female	30	Intermediate and Above	8	Urban	No	No	NO	Hospital isolation	1	1	3	1	1	1	2	0	0	10	2	4	2	2	2	2	2	3	2	2	1	1	1	1	1	1	2	2	1	1	35	1	1	1	3	3	1	4	3	1
186	Female	31	Intermediate and Above	7	Urban	No	No	NO	Home isolation	0	0	0	0	0	0	0	0	0	0	1	1	1	1	1	1	1	1	1	1	1	1	1	1	1	2	1	1	1	1	21	0	0	0	0	1	0	0	0	0
187	Female	45	Intermediate and Above	26	Urban	No	No	NO	Hospital isolation	0	0	1	1	1	0	0	0	0	3	1	2	2	1	1	1	1	1	1	2	1	1	1	1	1	1	1	1	2	1	24	1	1	0	1	3	0	4	1	0
188	Female	34	Intermediate and Above	10	Urban	No	No	NO	Home isolation	2	1	1	1	1	0	1	1	0	8	2	2	2	3	1	2	2	2	2	1	2	1	1	2	2	2	2	1	1	1	34	1	1	1	3	4	1	3	3	1
189	Female	30	Intermediate and Above	8	Rural or Township	No	No	NO	Home isolation	0	0	0	0	0	0	0	0	0	0	1	1	1	1	1	1	1	1	1	1	1	1	1	1	1	1	1	1	1	1	20	0	0	0	4	4	0	4	4	0
190	Female	28	Entry-Level	7	Urban	No	No	NO	Hospital isolation	0	0	0	0	1	0	0	0	0	1	1	1	1	1	1	1	1	1	1	1	1	1	1	1	1	1	1	1	1	1	20	0	0	0	4	4	0	4	4	0
191	Female	32	Intermediate and Above	11	Urban	No	No	NO	Home isolation	0	0	0	0	0	0	0	0	0	0	1	1	1	1	1	2	1	1	1	1	1	1	1	1	1	1	1	1	1	1	21	0	0	1	1	1	1	1	2	0
192	Female	37	Intermediate and Above	18	Urban	No	No	NO	Hospital isolation	0	0	1	1	0	0	0	0	0	2	1	2	2	1	1	1	1	1	1	2	1	1	1	1	1	1	1	1	1	1	23	0	2	0	4	4	0	4	4	0
193	Female	30	Entry-Level	7	Urban	No	No	NO	Hospital isolation	0	1	1	1	1	0	0	0	0	4	1	2	2	1	1	2	1	1	1	1	2	1	1	1	1	1	1	1	1	1	24	1	1	0	4	4	1	0	0	1
194	Female	31	Entry-Level	10	Urban	No	No	NO	Hospital isolation	3	0	2	3	2	0	0	0	0	10	1	3	4	4	2	1	1	1	1	1	2	1	1	1	1	2	1	1	1	1	31	0	0	0	4	4	0	4	4	0
195	Female	28	Entry-Level	7	Urban	No	No	NO	Home isolation	0	1	1	1	1	1	1	1	0	7	2	2	2	1	1	2	2	2	1	3	2	2	1	2	2	2	2	1	1	2	35	1	1	1	3	3	1	3	3	1
196	Female	36	Intermediate and Above	16	Urban	No	No	NO	Home isolation	0	1	1	0	0	0	0	0	0	2	1	2	1	1	1	2	1	1	1	1	2	1	1	1	1	1	1	1	1	1	23	1	1	1	1	3	1	3	2	1
197	Female	32	Intermediate and Above	10	Urban	No	No	NO	Hospital isolation	1	1	1	1	1	0	1	0	0	6	2	2	2	2	1	2	1	2	2	2	1	1	1	1	1	1	1	1	1	1	28	1	1	1	3	2	2	2	2	2
198	Female	35	Entry-Level	12	Urban	No	No	NO	Home isolation	1	1	1	2	1	0	0	0	0	6	2	2	3	2	1	2	1	1	1	1	1	1	1	1	1	1	1	1	1	1	26	0	0	0	4	3	0	4	4	0
199	Female	39	Entry-Level	10	Urban	No	No	NO	Home isolation	1	1	2	0	1	1	2	0	0	8	2	3	1	2	1	1	1	3	1	1	1	1	1	1	2	1	2	1	2	1	29	2	2	2	2	2	1	2	1	2
200	Female	36	Intermediate and Above	16	Urban	No	No	NO	Home isolation	1	1	1	0	0	0	0	0	0	3	2	2	1	2	1	2	2	1	1	2	2	1	1	1	1	1	2	1	1	1	28	1	0	0	0	2	2	2	1	1
201	Female	30	Entry-Level	8	Urban	No	Yes	NO	Hospital isolation	2	1	3	3	1	0	2	1	0	13	2	4	4	3	2	2	1	3	1	2	1	2	2	2	3	1	2	1	1	1	40	0	0	1	0	2	1	2	2	1
202	Female	28	Entry-Level	5	Urban	No	No	NO	Home isolation	1	1	1	1	1	0	0	0	0	5	2	2	2	2	1	1	1	1	1	2	1	1	1	1	1	1	2	1	1	1	26	0	1	1	3	3	1	3	3	1
203	Female	53	Intermediate and Above	32	Urban	No	No	NO	Hospital isolation	0	0	0	0	0	0	0	0	0	0	1	1	1	1	1	1	1	1	1	1	1	1	2	1	1	1	1	1	1	1	21	1	1	0	1	2	1	1	1	0
204	Female	51	Intermediate and Above	31	Urban	No	No	NO	Hospital isolation	0	0	1	1	0	0	1	0	1	4	2	2	2	1	1	2	1	2	2	1	1	1	1	1	2	1	1	1	1	1	27	2	2	2	2	2	2	2	2	2
205	Female	28	Entry-Level	6	Urban	No	No	NO	Home isolation	2	0	0	1	0	0	0	0	0	3	2	1	2	3	2	1	1	1	1	2	2	2	1	1	1	2	3	1	1	1	31	3	1	1	3	3	0	4	2	2
206	Female	36	Intermediate and Above	11	Urban	No	No	NO	Home isolation	0	0	0	0	0	0	0	0	0	0	1	1	1	1	1	1	1	1	1	1	1	1	1	1	1	1	1	1	1	1	20	1	0	0	4	4	1	1	2	1
207	Female	34	Intermediate and Above	12	Urban	No	No	NO	Home isolation	2	0	3	2	0	0	2	0	0	9	2	4	3	3	1	4	1	3	1	1	1	1	1	1	2	1	1	1	2	1	35	1	0	1	1	2	1	1	1	1
208	Female	28	Entry-Level	7	Urban	No	No	NO	Hospital isolation	0	0	0	0	0	0	0	0	0	0	1	1	1	1	1	1	1	1	1	1	1	1	1	1	1	1	1	1	1	1	20	0	0	0	4	4	0	4	4	0
210	Female	51	Intermediate and Above	33	Urban	No	No	NO	Hospital isolation	1	1	1	0	1	0	0	1	0	5	2	2	1	2	1	2	2	1	1	2	1	1	1	1	1	1	2	1	1	2	28	1	1	1	3	3	1	3	3	0
214	Female	36	Intermediate and Above	15	Urban	No	No	NO	Hospital isolation	1	1	1	1	0	0	0	0	0	4	1	2	2	2	1	2	1	1	1	1	1	1	1	1	1	1	1	1	1	1	24	1	1	0	3	4	1	3	3	1
218	Female	37	Intermediate and Above	16	Urban	No	Yes	NO	Home isolation	0	0	1	0	0	0	1	0	0	2	1	2	1	1	1	2	1	2	1	2	1	1	1	2	3	1	2	1	1	2	29	1	1	1	3	2	1	3	2	2
221	Female	34	Intermediate and Above	11	Urban	No	No	NO	Hospital isolation	0	0	1	1	0	0	0	0	0	2	1	2	2	1	2	1	1	1	2	2	1	1	1	1	1	1	1	1	1	1	25	1	1	2	1	2	1	1	2	1
222	Female	45	Intermediate and Above	16	Urban	No	No	NO	Home isolation	1	1	1	1	1	1	0	0	0	6	2	2	2	2	1	2	2	1	1	2	1	1	1	1	1	1	1	1	1	1	27	0	0	0	4	3	1	3	3	1
223	Female	30	Entry-Level	8	Urban	No	No	NO	Hospital isolation	0	0	0	0	0	0	0	0	0	0	1	1	1	1	1	1	1	1	1	1	1	1	1	1	1	1	1	1	1	1	20	0	0	0	4	4	0	1	1	0
225	Female	28	Entry-Level	7	Urban	No	No	NO	Home isolation	0	0	0	0	0	0	0	0	0	0	2	1	1	1	1	1	1	1	1	1	1	1	1	1	1	1	1	1	1	1	21	1	1	1	3	2	0	1	3	1
226	Female	37	Entry-Level	15	Urban	No	No	NO	Hospital isolation	2	1	2	2	2	2	2	2	0	15	3	3	3	3	3	4	1	3	3	3	1	2	2	3	4	3	3	2	2	2	53	3	3	3	1	4	4	1	2	3
227	Female	44	Entry-Level	25	Urban	No	No	NO	Hospital isolation	0	0	1	0	0	0	0	0	0	1	1	2	1	1	1	1	1	1	1	1	1	1	1	1	1	1	1	1	1	1	21	0	0	0	1	1	2	1	1	0
228	Female	30	Entry-Level	9	Urban	No	No	NO	Hospital isolation	0	1	1	1	0	0	0	0	0	3	1	2	2	1	1	1	1	1	1	1	1	1	1	1	1	1	1	1	1	1	22	1	1	0	3	3	0	4	4	0
230	Female	31	Entry-Level	8	Urban	No	No	NO	Home isolation	0	0	0	0	0	0	0	0	0	0	1	1	1	1	1	1	1	1	1	1	1	1	1	1	1	1	1	1	1	1	20	0	0	0	4	4	1	3	4	0
231	Female	28	Entry-Level	7	Urban	No	No	NO	Home isolation	1	1	1	1	1	0	1	0	0	6	1	2	2	2	1	1	1	2	1	2	2	1	1	2	1	1	1	1	1	1	27	1	1	1	4	3	0	1	1	1
232	Female	31	Entry-Level	7	Urban	No	No	NO	Home isolation	0	0	0	0	0	0	0	0	0	0	1	1	1	1	1	1	1	1	1	1	1	1	1	1	1	1	1	1	1	1	20	0	0	0	4	4	0	4	4	0
233	Female	32	Entry-Level	10	Urban	No	No	Yes	Home isolation	1	1	3	1	1	0	0	0	0	7	2	4	2	2	2	2	1	1	1	1	1	1	1	2	1	1	1	1	1	1	29	1	0	1	1	1	0	0	2	0
234	Female	32	Entry-Level	10	Urban	No	No	Yes	Home isolation	1	1	1	1	0	0	0	0	0	4	2	2	2	2	2	2	1	1	1	1	1	1	1	2	1	1	1	1	1	1	27	1	0	0	2	3	1	0	3	0
235	Female	50	Intermediate and Above	32	Urban	No	No	NO	Hospital isolation	0	0	1	1	0	0	0	0	0	2	1	2	2	1	1	1	2	1	1	1	1	1	1	1	1	1	1	1	1	1	23	1	1	1	3	4	0	1	1	1
236	Female	44	Entry-Level	24	Urban	No	No	NO	Home isolation	0	0	0	0	0	0	0	0	0	0	1	1	1	1	1	1	1	1	1	1	1	1	1	1	1	1	1	1	1	1	20	0	1	1	3	4	1	3	3	0
237	Female	41	Intermediate and Above	22	Urban	No	No	NO	Hospital isolation	1	1	1	1	1	1	1	1	0	8	3	2	2	2	2	2	2	2	3	3	1	2	2	2	2	2	2	2	2	1	41	1	1	2	2	2	2	2	2	2
239	Female	37	Intermediate and Above	16	Urban	No	No	NO	Home isolation	0	0	0	0	0	0	0	0	0	0	1	1	1	1	1	1	1	1	1	1	1	1	1	1	1	1	1	1	1	1	20	0	1	1	4	2	1	1	1	0
242	Female	29	Entry-Level	5	Urban	No	No	NO	Hospital isolation	1	1	1	1	0	0	1	0	0	5	2	2	2	2	2	1	2	2	2	2	2	2	2	1	1	1	2	2	1	1	34	1	1	1	3	3	1	3	3	1
244	Female	43	Intermediate and Above	25	Urban	No	No	NO	Home isolation	1	0	1	1	1	1	1	0	0	6	1	2	2	2	1	2	1	2	2	2	1	1	1	1	1	1	2	1	1	1	28	1	1	1	2	2	0	1	1	1
248	Female	35	Intermediate and Above	13	Urban	No	No	NO	Hospital isolation	1	0	0	1	1	0	1	0	0	4	2	1	2	2	1	1	1	2	1	2	1	1	1	1	1	1	1	1	2	1	26	1	1	0	1	3	1	3	3	1
249	Female	32	Intermediate and Above	12	Urban	No	No	NO	Hospital isolation	1	1	2	1	0	0	0	0	0	5	1	3	2	2	2	1	2	1	1	1	2	1	1	1	1	1	2	1	1	2	29	1	1	1	3	3	0	2	2	2
250	Female	30	Entry-Level	7	Urban	No	No	NO	Home isolation	0	1	1	1	0	0	0	0	0	3	1	2	2	1	1	1	1	1	1	1	1	1	1	1	1	1	1	1	1	1	22	0	0	0	4	4	0	4	4	0
251	Female	50	Intermediate and Above	30	Urban	No	No	NO	Home isolation	0	0	0	0	0	0	0	0	0	0	1	1	1	1	1	1	1	1	1	1	1	1	1	1	1	1	1	1	1	1	20	1	0	0	1	2	0	1	1	0
252	Female	41	Intermediate and Above	20	Urban	No	No	NO	Home isolation	0	0	0	0	0	0	0	0	0	0	1	1	1	1	1	1	1	1	1	1	1	1	1	1	1	1	1	1	1	1	20	0	0	0	0	0	4	0	0	4
253	Female	32	Intermediate and Above	8	Urban	No	No	NO	Home isolation	3	2	1	3	3	1	3	2	0	18	2	2	4	4	1	4	3	4	2	1	1	1	1	1	1	1	1	1	1	1	37	1	1	1	3	3	3	3	2	1
254	Female	54	Intermediate and Above	34	Urban	No	No	NO	Home isolation	0	0	0	0	0	0	0	0	0	0	1	1	1	1	1	1	1	1	1	1	1	1	1	1	1	1	1	1	1	1	20	1	0	0	1	1	0	1	1	1
255	Female	33	Intermediate and Above	11	Urban	No	No	NO	Home isolation	0	0	1	0	0	0	0	0	0	1	1	2	1	1	1	1	1	1	1	2	1	1	1	1	1	1	1	1	1	1	22	1	1	0	0	1	2	1	1	1
256	Female	29	Entry-Level	6	Urban	No	No	NO	Hospital isolation	0	0	1	1	1	1	1	1	1	7	2	2	2	1	2	2	2	2	2	2	2	2	2	2	2	2	2	2	2	2	39	1	1	1	3	3	1	3	3	1
257	Female	36	Intermediate and Above	14	Urban	No	No	NO	Hospital isolation	1	1	1	1	1	0	0	1	0	6	1	2	2	2	2	2	1	1	2	2	1	1	1	1	1	1	1	2	1	1	28	1	1	1	0	0	1	4	0	1
258	Female	29	Entry-Level	8	Urban	No	No	NO	Home isolation	0	0	1	1	1	0	2	0	0	5	1	2	2	1	1	1	1	3	2	1	1	1	1	1	1	1	1	1	1	1	25	0	0	0	4	4	0	1	1	0
259	Female	39	Intermediate and Above	16	Urban	No	No	NO	Home isolation	0	0	1	1	1	0	1	0	0	4	1	2	2	1	2	1	1	2	1	1	1	1	1	1	1	1	1	1	1	1	24	1	1	1	1	1	1	1	2	1
260	Female	29	Entry-Level	9	Urban	No	No	NO	Home isolation	0	1	0	1	1	1	0	0	0	4	2	1	2	1	2	1	2	1	1	2	1	1	2	2	2	1	3	1	1	1	30	1	0	0	3	3	0	3	4	0
265	Female	47	Intermediate and Above	27	Urban	No	No	NO	Home isolation	1	1	1	2	1	1	1	1	0	9	2	2	3	2	1	3	2	2	1	3	2	1	1	2	2	1	2	2	1	1	36	2	2	2	3	3	3	2	3	3
266	Female	38	Intermediate and Above	19	Urban	No	No	NO	Home isolation	1	1	1	2	1	0	0	0	0	6	1	2	3	2	1	2	1	1	1	1	1	1	1	1	1	1	1	1	1	1	25	2	1	1	3	2	1	2	3	1
268	Female	33	Intermediate and Above	8	Urban	No	No	NO	Hospital isolation	1	1	2	2	2	0	1	1	0	10	1	3	3	2	1	1	1	2	1	1	1	1	1	1	1	1	1	1	1	1	26	1	1	0	3	2	2	1	2	1
269	Female	46	Intermediate and Above	29	Urban	No	No	NO	Home isolation	1	1	1	1	1	1	2	1	1	10	2	2	2	2	1	2	2	3	1	2	2	1	2	2	2	2	2	2	2	1	37	2	1	2	3	3	1	2	3	1
270	Female	36	Intermediate and Above	13	Urban	No	No	NO	Home isolation	0	0	0	0	0	0	0	0	0	0	1	1	1	1	1	1	1	1	1	1	1	1	1	1	1	1	1	1	1	1	20	0	0	0	4	4	0	4	4	0
272	Female	30	Entry-Level	7	Urban	No	No	NO	Hospital isolation	0	0	1	1	0	0	0	0	0	2	2	2	2	1	1	1	1	1	1	3	1	1	1	1	1	1	2	1	1	1	26	0	0	0	4	4	0	4	4	0
273	Female	32	Entry-Level	11	Urban	No	No	NO	Home isolation	1	1	0	0	3	1	0	0	0	6	1	1	1	2	1	1	2	1	1	1	1	1	1	1	1	1	1	1	1	1	22	0	0	0	4	4	0	3	3	1
274	Male	32	Entry-Level	10	Urban	No	No	NO	Home isolation	0	0	0	0	0	0	0	0	0	0	1	1	1	1	1	1	1	1	1	1	1	1	1	1	1	1	1	1	1	1	20	1	0	0	3	2	0	0	0	0
276	Female	31	Entry-Level	10	Urban	No	No	NO	Home isolation	0	1	2	1	1	0	1	1	0	7	2	3	2	1	2	3	2	2	2	3	2	1	1	3	2	1	2	1	2	1	38	2	2	2	3	1	1	3	2	3
278	Female	35	Intermediate and Above	10	Urban	No	No	NO	Home isolation	0	0	0	0	0	0	0	0	0	0	1	1	1	1	1	1	1	1	1	1	1	1	1	1	1	1	1	1	1	1	20	0	0	0	2	2	2	1	2	1
279	Female	38	Intermediate and Above	14	Urban	No	No	NO	Hospital isolation	1	0	3	1	1	0	0	0	0	6	1	4	2	2	1	4	1	1	2	1	1	1	1	1	1	1	1	1	2	1	30	1	1	1	2	2	1	1	2	1
282	Female	30	Entry-Level	8	Urban	No	No	NO	Home isolation	0	0	0	0	0	0	0	0	0	0	1	1	1	1	1	1	1	1	1	1	1	1	1	1	1	1	1	1	1	1	20	0	0	0	4	4	0	4	4	0
283	Female	35	Intermediate and Above	13	Urban	No	No	NO	Home isolation	0	0	0	0	0	0	0	0	0	0	1	1	1	1	1	1	1	1	2	2	1	1	1	1	1	1	1	1	1	1	22	1	1	1	3	3	1	3	3	1
284	Female	40	Intermediate and Above	21	Urban	No	No	NO	Hospital isolation	0	0	0	0	0	0	1	0	0	1	1	1	1	1	1	1	1	2	2	2	1	2	1	1	1	1	1	1	1	1	24	1	1	0	0	0	0	1	1	1
286	Female	32	Intermediate and Above	12	Urban	No	No	Yes	Hospital isolation	1	1	2	1	0	0	0	0	0	5	1	3	2	2	1	1	1	1	1	1	1	1	1	1	1	1	1	1	1	1	24	1	1	0	4	3	1	1	3	1
292	Female	41	Intermediate and Above	20	Urban	No	No	NO	Home isolation	0	0	0	0	0	0	1	0	0	1	2	1	1	1	2	1	1	2	2	2	1	1	2	1	2	1	1	2	1	1	28	1	1	0	2	3	0	2	1	1
301	Female	37	Intermediate and Above	18	Urban	No	Yes	NO	Home isolation	2	1	1	1	0	1	1	1	0	8	2	2	2	3	1	2	2	2	1	1	1	1	1	2	2	1	1	1	1	1	30	2	1	1	1	2	1	1	1	1
302	Female	29	Entry-Level	7	Urban	No	No	NO	Home isolation	0	1	0	0	0	0	0	0	0	1	1	1	1	1	1	1	1	1	1	1	1	1	1	1	1	1	1	1	1	1	20	2	2	1	3	4	1	2	3	0
305	Female	37	Intermediate and Above	18	Urban	No	No	NO	Home isolation	1	1	1	1	1	1	1	0	0	7	2	2	2	2	2	2	2	2	2	2	2	1	1	2	2	1	2	2	1	1	35	2	2	2	2	2	1	2	3	1
306	Female	34	Intermediate and Above	13	Urban	No	No	NO	Hospital isolation	0	0	1	0	0	0	0	0	0	1	1	2	1	1	1	1	1	1	1	1	1	1	1	1	1	1	1	1	1	1	21	0	0	0	0	1	0	0	1	0
314	Female	31	Intermediate and Above	9	Urban	No	Yes	NO	Hospital isolation	2	1	2	2	2	1	1	0	0	11	2	3	3	3	1	2	1	2	2	2	1	2	2	2	2	2	2	1	1	3	39	3	2	2	3	3	2	3	3	1
315	Female	31	Intermediate and Above	8	Urban	No	No	NO	Home isolation	1	1	1	1	1	1	1	0	0	7	2	2	2	2	1	2	2	2	1	2	1	2	1	1	1	1	2	1	1	1	30	1	2	0	1	1	1	1	1	1
316	Female	32	Intermediate and Above	12	Urban	No	No	NO	Home isolation	0	1	0	0	0	0	0	0	0	1	1	1	1	1	1	1	1	1	1	1	1	1	1	1	1	1	2	1	1	1	21	1	1	0	1	2	0	1	1	1
327	Female	35	Entry-Level	11	Urban	No	No	NO	Hospital isolation	1	1	1	2	2	1	1	0	0	9	2	2	3	2	2	2	2	2	3	3	2	3	1	1	1	1	2	1	2	1	38	2	3	1	2	3	1	0	3	2
328	Female	50	Intermediate and Above	32	Urban	No	No	NO	Home isolation	1	1	1	1	0	1	2	1	0	8	2	2	2	2	2	2	2	3	1	2	1	1	2	2	1	1	2	2	1	2	35	1	1	1	3	3	1	3	3	1
331	Female	33	Intermediate and Above	12	Urban	No	No	NO	Home isolation	0	0	1	1	0	0	1	0	0	3	1	2	2	1	1	1	1	2	1	1	1	1	1	1	1	1	1	1	1	1	23	1	1	0	0	1	2	0	1	1
334	Female	42	Intermediate and Above	20	Urban	No	No	NO	Hospital isolation	1	1	1	1	1	2	3	1	0	11	2	2	2	2	1	1	1	4	1	2	1	1	2	1	1	1	1	1	2	1	30	0	0	0	4	4	0	4	4	0
338	Female	40	Intermediate and Above	23	Urban	No	No	Yes	Home isolation	1	1	2	2	1	1	1	1	0	10	3	3	3	2	2	4	3	2	2	2	1	2	1	1	4	2	2	2	2	2	45	2	2	2	2	2	2	2	3	1
339	Female	27	Entry-Level	7	Urban	No	No	NO	Home isolation	0	0	0	0	0	0	0	0	0	0	1	1	1	1	1	1	1	1	1	1	1	1	1	1	1	1	1	1	1	1	20	0	0	0	4	4	0	4	4	0
342	Female	27	Intermediate and Above	7	Urban	No	No	NO	Hospital isolation	1	1	1	1	1	0	0	0	0	5	2	2	2	2	1	2	2	1	2	2	2	1	1	2	2	2	2	2	1	1	34	1	2	0	3	2	1	1	2	1
345	Female	27	Intermediate and Above	6	Urban	No	No	NO	Home isolation	0	1	0	0	0	0	0	0	0	1	1	1	1	1	1	2	2	1	1	1	2	1	1	1	1	1	1	1	1	1	23	1	1	1	1	1	1	1	1	1
348	Female	41	Intermediate and Above	20	Urban	No	No	NO	Home isolation	1	0	0	0	0	0	0	0	0	1	1	1	1	2	1	1	1	1	1	1	1	1	1	1	1	1	1	1	1	1	21	0	0	0	0	4	0	0	0	0
350	Female	40	Intermediate and Above	19	Urban	No	No	NO	Hospital isolation	0	0	0	0	0	0	1	0	0	1	1	1	1	1	1	1	1	2	1	2	1	1	1	2	1	1	1	1	1	1	23	1	1	0	3	4	0	3	3	1
355	Female	33	Intermediate and Above	9	Urban	No	No	NO	Hospital isolation	1	1	1	1	2	0	1	1	0	8	1	2	2	2	2	2	1	2	2	3	1	2	2	2	2	2	1	1	1	1	34	1	2	1	1	1	1	1	1	2
356	Female	33	Entry-Level	12	Urban	No	No	NO	Hospital isolation	1	1	2	2	2	0	1	1	0	10	2	3	3	2	2	1	2	2	2	3	1	1	1	1	1	1	1	1	1	1	32	2	1	1	3	3	1	3	3	1
358	Female	25	Entry-Level	5	Urban	No	No	NO	Hospital isolation	0	0	0	0	0	0	0	0	0	0	1	1	1	1	1	1	1	1	1	1	1	1	1	1	1	1	1	1	1	1	20	0	0	0	4	4	0	4	4	0
362	Female	29	Entry-Level	6	Urban	No	No	NO	Home isolation	1	0	0	0	1	1	0	0	0	3	1	1	1	2	1	1	1	1	1	1	1	1	1	1	1	1	1	1	1	1	21	1	1	0	3	2	1	1	2	1
365	Female	30	Entry-Level	7	Rural or Township	No	No	NO	Hospital isolation	0	0	0	1	0	1	2	0	0	4	2	1	2	1	1	1	1	3	1	3	1	1	2	2	1	2	2	2	2	2	33	1	1	0	3	3	1	3	4	0
366	Female	28	Entry-Level	6.5	Urban	No	No	NO	Home isolation	1	1	1	1	0	1	1	0	1	7	1	2	2	2	1	2	1	2	1	1	1	1	1	1	1	1	2	1	1	1	26	1	1	1	3	3	1	3	3	2
367	Female	32	Intermediate and Above	10	Urban	No	No	NO	Home isolation	0	0	0	0	0	0	0	0	0	0	1	1	1	1	1	1	1	1	1	1	1	1	1	1	1	1	1	1	1	1	20	1	1	0	0	1	0	0	1	1
369	Female	35	Intermediate and Above	14	Urban	No	No	NO	Home isolation	1	1	1	1	0	1	1	0	0	6	1	2	2	2	1	2	1	2	1	1	1	1	1	2	2	1	1	1	1	1	27	1	0	0	1	1	2	1	1	1
370	Female	29	Entry-Level	7	Urban	Yes	No	NO	Home isolation	0	0	0	0	0	0	0	0	0	0	1	1	1	1	1	1	2	1	1	1	1	1	1	1	1	1	1	1	1	1	21	0	0	0	4	4	0	4	4	0
371	Female	54	Intermediate and Above	35	Urban	No	No	NO	Hospital isolation	0	0	0	0	0	0	0	0	0	0	1	1	1	1	1	2	1	1	1	1	1	1	1	1	1	1	1	1	1	1	21	1	2	1	1	2	2	0	1	1
376	Female	30	Entry-Level	7	Urban	No	No	Yes	Hospital isolation	1	0	1	3	3	0	0	0	1	9	3	2	4	2	3	1	3	1	3	3	1	2	2	1	2	2	1	1	2	1	40	1	0	0	3	2	1	3	1	1
383	Female	29	Intermediate and Above	7	Urban	No	No	No	Home isolation	1	1	0	1	0	1	1	1	0	6	1	1	2	2	1	2	2	2	1	2	1	1	1	1	2	1	1	1	1	1	27	1	1	0	1	1	1	2	2	2
384	Female	30	Intermediate and Above	9	Urban	No	No	No	Home isolation	1	1	1	1	1	1	1	1	0	8	2	2	2	2	1	1	2	2	1	1	1	1	1	1	1	2	1	1	1	1	27	1	1	1	3	3	1	3	3	1
385	Female	33	Intermediate and Above	13	Urban	No	No	No	Home isolation	0	0	0	0	0	0	0	0	0	0	1	1	1	1	1	1	1	1	1	1	1	1	1	1	1	1	1	1	1	1	20	0	0	0	4	4	0	4	4	0
386	Female	35	Intermediate and Above	10	Urban	No	No	No	Home isolation	0	0	0	0	0	0	0	0	0	0	1	1	1	1	1	1	1	1	1	1	1	1	1	1	1	1	1	1	1	1	20	0	0	0	4	4	0	4	4	0
387	Female	28	Entry-Level	7	Urban	No	No	No	Home isolation	1	1	0	1	0	0	1	0	0	4	2	1	2	2	1	2	1	2	1	3	1	2	1	2	2	1	1	1	1	1	30	2	1	1	2	2	1	0	2	1
389	Female	31	Entry-Level	8	Urban	No	No	No	Home isolation	1	1	0	2	0	0	0	0	0	4	1	1	3	2	1	2	1	1	1	1	1	1	1	1	1	1	1	1	1	1	24	1	2	1	3	1	1	3	3	1
390	Female	26	Entry-Level	8	Urban	No	No	No	Home isolation	2	2	3	1	1	1	1	1	1	13	2	4	2	3	2	2	2	2	2	2	3	1	1	2	2	2	1	2	2	1	40	0	1	2	3	3	0	2	3	1
391	Female	31	Intermediate and Above	9	Urban	No	No	No	Home isolation	0	0	1	0	0	0	1	0	0	2	1	2	1	1	1	1	1	2	1	1	1	1	1	1	1	1	1	1	1	1	22	1	1	0	0	0	0	0	0	0
392	Female	34	Intermediate and Above	10	Urban	No	No	No	Home isolation	1	1	1	1	0	1	1	0	0	6	1	2	2	2	1	2	1	2	1	2	1	1	1	1	1	1	1	1	1	1	26	1	1	1	1	1	1	1	3	1
393	Female	31	Entry-Level	7	Urban	No	No	No	Home isolation	0	0	1	0	0	0	0	0	0	1	1	2	1	1	1	1	1	1	1	1	1	1	1	1	1	1	1	1	1	1	21	1	1	0	4	4	0	1	1	0
394	Female	32	Intermediate and Above	12	Urban	No	No	No	Home isolation	0	0	0	0	0	0	0	0	0	0	1	1	1	1	1	1	1	1	1	1	1	1	1	1	1	1	1	1	1	1	20	0	0	0	4	4	1	1	1	3
395	Female	32	Intermediate and Above	11	Urban	No	No	No	Home isolation	1	1	1	1	1	1	1	1	1	9	2	2	2	2	2	2	2	2	2	2	2	2	2	2	2	2	2	2	2	2	40	2	2	2	2	2	2	2	2	2
402	Female	35	Intermediate and Above	11	Urban	No	No	No	Home isolation	1	0	1	1	1	1	1	0	0	6	2	2	2	2	1	1	2	2	1	2	1	1	2	1	1	2	2	2	2	1	32	1	1	1	3	3	1	3	3	1
405	Female	30	Intermediate and Above	7	Urban	No	No	No	Home isolation	1	0	1	1	1	1	0	0	0	5	2	2	2	2	1	1	1	1	1	1	1	1	1	2	1	1	1	1	1	1	25	0	1	0	1	3	2	2	3	0
406	Female	32	Intermediate and Above	9	Urban	No	No	No	Home isolation	3	2	1	2	2	1	2	0	0	13	1	2	3	4	1	1	1	3	1	1	1	1	1	1	1	2	1	1	1	1	29	0	0	0	4	4	0	4	4	0
407	Female	40	Intermediate and Above	16	Urban	No	No	No	Home isolation	0	0	0	0	0	0	0	0	0	0	1	1	1	1	1	1	1	1	1	1	1	1	1	1	1	1	3	1	1	1	22	1	1	1	3	1	0	0	0	0
411	Female	39	Intermediate and Above	16	Urban	No	No	Yes	Home isolation	0	0	0	0	0	0	0	0	0	0	1	1	1	1	1	1	1	1	1	1	1	1	1	1	1	1	1	1	1	1	20	1	1	1	3	3	1	1	1	0
415	Female	37	Intermediate and Above	18	Urban	No	Yes	NO	Home isolation	2	2	3	2	3	1	2	1	1	17	3	4	3	3	3	3	3	3	3	4	2	2	3	3	4	2	2	3	2	2	57	2	2	3	3	4	3	3	4	3
416	Female	30	Entry-Level	7	Urban	No	No	NO	Hospital isolation	0	0	1	1	0	0	0	0	0	2	2	2	2	1	1	1	1	1	1	2	2	1	2	2	1	2	2	1	1	1	29	2	1	1	3	4	2	3	3	1
418	Female	27	Entry-Level	7	Urban	No	No	NO	Home isolation	0	0	0	0	0	0	0	0	0	0	1	1	1	1	1	1	1	1	1	2	1	1	1	1	1	1	1	1	1	1	21	0	0	0	4	4	0	4	4	0
422	Female	33	Entry-Level	10	Urban	No	No	NO	Home isolation	1	0	0	0	0	1	1	0	0	3	1	1	1	2	1	1	2	2	1	1	1	1	3	1	1	1	2	1	1	1	26	1	1	1	2	4	0	4	3	2
423	Female	31	Entry-Level	13	Urban	No	No	NO	Hospital isolation	2	1	3	3	2	0	1	0	0	12	3	4	4	3	1	3	2	2	2	2	1	2	2	2	2	1	2	1	2	2	43	3	2	1	3	3	1	3	3	1
425	Female	29	Entry-Level	7	Urban	No	No	NO	Hospital isolation	1	1	1	1	1	1	1	1	1	9	3	2	2	2	3	2	2	2	2	4	2	4	3	2	3	3	3	2	2	2	50	2	2	3	3	3	1	2	3	2
426	Female	28	Entry-Level	5	Urban	No	No	NO	Home isolation	0	0	0	0	0	0	0	0	0	0	1	1	1	1	1	1	1	1	1	1	1	1	1	1	1	1	1	1	1	1	20	0	0	0	4	4	0	4	4	0
427	Female	30	Entry-Level	8	Urban	No	No	NO	Home isolation	0	0	0	0	0	0	0	0	0	0	1	1	1	1	1	1	1	1	1	1	1	1	1	1	1	1	1	1	1	1	20	0	0	0	4	4	0	4	4	0
428	Female	27	Entry-Level	7	Urban	No	No	NO	Home isolation	0	0	0	0	0	0	0	0	0	0	1	1	1	1	1	1	2	1	2	2	2	2	2	2	1	1	2	2	1	1	29	1	1	1	1	2	1	3	3	1
429	Female	29	Entry-Level	6	Urban	No	No	NO	Hospital isolation	0	0	0	1	0	0	1	0	0	2	1	1	2	1	1	1	1	2	1	1	1	1	1	1	1	1	1	1	1	1	22	1	1	0	3	3	1	1	1	1
430	Female	30	Intermediate and Above	7	Urban	No	No	NO	Home isolation	0	0	0	1	0	0	0	0	0	1	1	1	2	1	1	1	1	1	1	1	1	1	1	1	1	1	1	1	1	1	21	0	0	0	3	3	0	1	2	0
431	Female	46	Intermediate and Above	26	Urban	No	No	NO	Hospital isolation	1	0	1	1	0	1	1	0	0	5	2	2	2	2	2	2	2	2	1	2	1	1	2	1	2	1	1	1	1	1	31	1	1	1	1	1	1	1	1	1
434	Female	27	Entry-Level	2	Urban	No	No	NO	Home isolation	0	0	0	1	1	0	0	0	0	2	1	1	2	1	1	1	1	1	1	1	1	2	1	1	1	1	1	1	1	1	22	0	0	0	4	4	0	4	4	0
436	Female	29	Intermediate and Above	7	Urban	Yes	Yes	NO	Hospital isolation	1	0	1	1	1	1	1	1	1	8	2	2	2	2	2	2	2	2	2	2	2	2	2	2	2	2	2	2	2	2	40	1	1	1	3	3	1	3	3	1
437	Female	28	Entry-Level	6	Urban	No	No	NO	Home isolation	0	0	0	0	0	0	0	0	0	0	1	1	1	1	1	1	1	1	1	1	1	1	1	1	1	1	1	1	1	1	20	1	1	1	3	3	1	3	3	1
438	Female	32	Entry-Level	9	Urban	No	No	NO	Home isolation	0	0	0	0	0	0	0	0	0	0	1	1	1	1	1	1	1	1	1	1	1	1	1	1	1	1	1	1	1	1	20	0	0	0	4	4	0	4	4	0
439	Female	32	Intermediate and Above	11	Urban	No	No	NO	Hospital isolation	1	1	1	1	1	1	1	1	1	9	2	2	2	2	2	2	2	2	2	3	1	2	2	2	2	1	1	1	2	1	36	3	3	1	2	2	2	2	2	2
440	Female	33	Intermediate and Above	10	Urban	No	No	NO	Hospital isolation	0	0	0	0	0	0	0	0	0	0	1	1	1	1	1	1	1	1	1	1	1	1	1	1	1	1	1	1	1	1	20	0	0	0	4	4	0	4	4	0
443	Female	29	Entry-Level	5	Urban	No	No	NO	Hospital isolation	1	0	1	1	0	0	0	0	0	3	1	2	2	2	1	1	1	1	1	1	1	1	1	1	1	1	1	1	1	1	23	1	1	0	4	3	0	3	1	1
444	Female	32	Intermediate and Above	10	Urban	No	No	NO	Home isolation	0	0	2	1	1	1	1	0	0	6	2	3	2	1	1	2	2	2	1	1	1	1	2	2	1	1	1	2	1	1	30	1	1	1	3	3	1	3	4	1
445	Female	29	Entry-Level	7	Urban	No	No	NO	Home isolation	1	1	0	1	1	1	1	1	1	8	1	1	2	2	1	2	2	2	2	2	1	1	1	1	1	1	2	1	1	1	28	0	0	0	4	4	0	4	4	0
446	Female	32	Entry-Level	8	Urban	No	No	NO	Home isolation	0	0	0	0	0	0	0	0	0	0	1	1	1	1	1	1	1	1	1	1	1	1	1	1	1	1	1	1	1	1	20	0	0	0	4	4	0	4	4	0
447	Female	29	Entry-Level	6	Urban	No	No	NO	Hospital isolation	1	0	1	1	1	0	1	1	0	6	2	2	2	2	1	1	1	2	1	1	1	1	1	2	1	2	2	1	2	1	29	2	0	2	1	2	3	3	2	2
448	Female	36	Intermediate and Above	15	Urban	No	No	NO	Home isolation	0	0	0	0	0	0	0	0	0	0	1	1	1	1	1	1	1	1	1	1	1	1	1	1	1	1	1	1	1	1	20	1	1	0	1	1	1	1	1	0
450	Female	35	Intermediate and Above	14	Urban	No	No	NO	Hospital isolation	0	0	0	1	1	0	1	0	0	3	1	1	2	1	1	1	1	2	1	1	1	1	1	1	1	1	1	1	1	1	22	1	1	0	1	2	3	0	1	0
454	Female	28	Entry-Level	6	Urban	No	No	NO	Hospital isolation	0	0	0	0	0	0	0	0	0	0	1	1	1	1	1	1	1	1	1	1	1	1	1	1	1	1	1	1	1	1	20	0	0	0	4	4	0	4	4	0
457	Female	36	Intermediate and Above	14	Urban	No	No	NO	Hospital isolation	0	0	0	1	1	0	0	1	0	3	2	1	2	1	1	1	1	1	1	1	1	1	1	1	1	1	1	1	1	1	22	2	1	2	1	2	1	1	2	1
459	Female	41	Intermediate and Above	20	Urban	No	No	NO	Hospital isolation	0	0	1	1	1	0	0	0	0	3	1	2	2	1	1	1	1	1	2	1	1	1	1	1	1	1	1	1	1	1	23	0	0	0	4	3	0	1	1	1
460	Female	36	Intermediate and Above	13	Urban	No	No	NO	Hospital isolation	1	1	1	1	1	1	1	1	1	9	2	2	2	2	1	2	2	2	3	2	2	2	1	2	2	2	1	1	1	1	35	1	1	1	3	3	1	3	3	1
463	Female	38	Intermediate and Above	14	Urban	No	No	NO	Home isolation	0	1	1	1	0	0	0	0	0	3	1	2	2	1	2	1	1	1	1	1	1	1	1	1	2	1	1	1	1	1	24	1	1	1	2	3	1	1	2	1
465	Female	28	Entry-Level	3	Urban	No	No	NO	Hospital isolation	0	1	1	1	1	1	1	1	1	8	2	2	2	1	2	2	2	2	2	2	2	2	2	2	2	2	2	2	2	2	39	1	1	1	3	3	1	3	3	1
466	Female	41	Intermediate and Above	17	2	No	No	NO	Hospital isolation	0	1	2	1	0	0	0	0	0	4	2	3	2	1	1	2	2	1	2	1	1	1	1	2	2	1	1	1	1	1	29	1	1	1	1	2	0	1	1	1
469	Female	39	Intermediate and Above	15	2	No	No	NO	Home isolation	1	1	0	1	0	0	0	1	0	4	1	1	2	2	1	2	1	1	1	1	1	1	1	1	1	1	2	1	1	1	24	1	1	0	2	2	1	1	2	1
470	Female	44	Intermediate and Above	15	2	No	No	NO	Home isolation	0	0	1	0	0	0	0	0	0	1	1	2	1	1	1	1	1	1	2	1	1	1	1	1	1	1	1	1	1	1	22	0	0	0	4	4	0	4	4	0
471	Female	30	Entry-Level	9	2	No	No	NO	Hospital isolation	0	0	1	1	0	1	2	0	0	5	1	2	2	1	1	1	2	3	3	1	1	1	1	1	1	1	2	1	1	1	28	1	1	0	1	2	1	1	1	1
472	Female	29	Entry-Level	5	2	No	No	NO	Home isolation	1	1	0	1	1	1	1	1	0	7	2	1	2	2	2	2	2	2	2	2	2	1	2	2	2	2	2	2	1	2	37	2	2	1	4	3	1	3	3	1
473	Female	33	Intermediate and Above	8	2	No	No	NO	Hospital isolation	0	0	0	0	0	0	0	0	0	0	1	1	1	1	1	1	1	1	1	1	1	1	1	1	1	1	1	1	1	1	20	0	0	0	4	4	0	4	4	0
474	Female	32	Intermediate and Above	8	2	No	No	Yes	Hospital isolation	1	2	1	2	2	1	1	0	0	10	2	2	3	2	1	2	3	2	2	1	1	1	1	1	1	1	1	1	1	1	30	3	3	3	2	3	3	2	3	2
475	Female	52	Intermediate and Above	32	2	No	No	Yes	Hospital isolation	0	0	0	0	0	0	0	0	0	0	1	1	1	1	1	1	1	1	1	1	1	1	1	1	1	1	1	1	1	1	20	0	0	0	0	0	0	1	1	1
[truncated: 37 more columns]
